# Supplementary material for: A tailored intervention for the detection of patients with coronary heart disease and mental or cognitive comorbidities in the German primary care setting: qualitative evaluation of implementation success
Source: BMC Health Serv Res. 2024 Nov 22;24:1454. doi: 10.1186/s12913-024-11841-z (PMC11585210; doi:10.1186/s12913-024-11841-z)
Supplement: Supplementary file 2 — Supplementary Material 2. [file 12913_2024_11841_MOESM2_ESM.pdf]

# ► Screening für Demenz und Mild Cognitive Impairment

## 1. Subjektive Gedächtnisprobleme

„Haben Sie das Gefühl, dass Ihr Gedächtnis in letzter Zeit nachgelassen hat?“

➔ Bei positiver Antwort gefolgt von:

„Machen Sie sich deswegen Sorgen?“

## 2. Six-Item Screener<sup>1</sup>

„Ich nenne Ihnen 3 Dinge. Bitte warten Sie, bis ich alle 3 Wörter gesagt habe, und wiederholen Sie sie dann. Merken Sie sich die Wörter, denn ich frage Sie demnächst noch einmal danach. Bitte wiederholen Sie“:

**(1. Wort) – (2. Wort) – (3. Wort)** z. B. „Auto - Blume - Ball“  
Maximal 3 Lernversuche

➔ Alle 3 Wörter richtig wiederholt? ☐ Ja ☐ Nein

„Jetzt stelle ich Ihnen 3 Fragen“:

|                                |                                   |                                         |
|--------------------------------|-----------------------------------|-----------------------------------------|
| „Welches Jahr haben wir?“      | <input type="radio"/> korrekt = 1 | <input type="radio"/> nicht korrekt = 0 |
| „Welchen Monat haben wir?“     | <input type="radio"/> korrekt = 1 | <input type="radio"/> nicht korrekt = 0 |
| „Welchen Wochentag haben wir?“ | <input type="radio"/> korrekt = 1 | <input type="radio"/> nicht korrekt = 0 |

„Wie hießen die 3 Dinge, die Sie sich merken sollten?“

|         |                                   |                                         |
|---------|-----------------------------------|-----------------------------------------|
| 1. Wort | <input type="radio"/> korrekt = 1 | <input type="radio"/> nicht korrekt = 0 |
| 2. Wort | <input type="radio"/> korrekt = 1 | <input type="radio"/> nicht korrekt = 0 |
| 3. Wort | <input type="radio"/> korrekt = 1 | <input type="radio"/> nicht korrekt = 0 |

Anzahl der erreichten Punkte: \_\_\_\_ / 6

(Bei Erreichen von 5 oder 6 Punkten sind alltagsrelevante kognitive Störungen mit hoher Wahrscheinlichkeit ausgeschlossen).

**Auffälligkeiten? ➔ Leitliniengerechte Versorgung und Ausgabe des Question Prompt Sheet**

<sup>1</sup> Krupp, S., Seebens, A., Kasper, J., Willkomm, M., Balck, F. (2018). Validierung der deutschen Fassung des Six-Item Screeners. Zeitschrift für Gerontologie und Geriatrie, 51(3), 275-281.

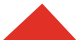

# Screening für psychische Störungen (Depression, Angst, Sonstige)

**1. Offene Einstiegsfrage:** „Wie fühlten Sie sich in den letzten Wochen in seelischer Hinsicht?“

## 2. Gesundheitsfragebogen für Patient\*innen (PHQ-4)<sup>1</sup>:

„Wie oft fühlten Sie sich im Verlauf der letzten 2 Wochen durch die folgenden Beschwerden beeinträchtigt?“

|                                                                                                            |                                                                            |                         |                          |                                |                      |
|------------------------------------------------------------------------------------------------------------|----------------------------------------------------------------------------|-------------------------|--------------------------|--------------------------------|----------------------|
| <b>Depression</b><br>(PHQ-2)<br>= Summe der Items<br>1 und 2, Scores<br>von ≥ 3 sind klinisch<br>relevant. | 1: Wenig Interesse oder Freude<br>an Ihren Tätigkeiten                     | Über-<br>haupt<br>nicht | An<br>einzelnen<br>Tagen | An mehr<br>als 50%<br>der Tage | Beinahe<br>jeden Tag |
|                                                                                                            | 2: Niedergeschlagenheit,<br>Schwermut oder Hoffnungs-<br>losigkeit         |                         |                          |                                |                      |
|                                                                                                            | 3: Nervosität, Ängstlichkeit<br>oder Anspannung                            |                         |                          |                                |                      |
|                                                                                                            | 4: Nicht in der Lage sein, Sor-<br>gen zu stoppen oder zu<br>kontrollieren |                         |                          |                                |                      |
|                                                                                                            |                                                                            | 0                       | 1                        | 2                              | 3                    |
|                                                                                                            |                                                                            | 0                       | 1                        | 2                              | 3                    |
|                                                                                                            |                                                                            | 0                       | 1                        | 2                              | 3                    |
|                                                                                                            |                                                                            | 0                       | 1                        | 2                              | 3                    |

**Angststörung**  
(GAD-2)  
= Summe aus den  
Items 3 und 4, Scores  
von ≥ 3 sind klinisch  
relevant.

## 3. Offene Anschlussfrage:

„Haben Sie noch weitere seelische Beschwerden außer den bisher genannten?“

## Auffälligkeiten?

→ Leitliniengerechte Versorgung und Ausgabe des Question Prompt Sheet

<sup>1</sup>Kroenke, K., Spitzer, R. L., Williams, J. B., Löwe, B. (2009). An ultra-brief screening scale for anxiety and depression: the PHQ-4. Psychosomatics, 50(6), 613-621.
